# Supplementary material for: Ice-proximal sea-ice reconstruction in Powell Basin, Antarctica since the Last Interglacial
Source: Copernicus journal article supplement (doi:10.5194/egusphere-2024-246), 2024-02-01
Supplement: Supplementary file 2 [file egusphere-2024-246-supplement.pdf]

# Ice-proximal sea-ice reconstruction in Powell Basin, Antarctica since the Last Interglacial

Wee Wei Khoo et al.

## S1: Age model

The age model of marine sediment core PS118\_63-1 was first established using a comparative analysis between the XRF-Ti record with the EDML  $\delta^{18}\text{O}$  record (Supplementary Fig. S1). Furthermore, the MIS 5/6 boundary is identified by the biostratigraphic marker *Rouxia leventerae* (ca. 130 ka BP; Zielinski et al., 2002). Since <1% relative abundance of *Rouxia leventerae* was found at core depth 6.19 m (0.6%), we estimated the last occurrence of *Rouxia leventerae* to be around 6.2 m. Planktic foraminifera were also selected for AMS  $^{14}\text{C}$ -dating (Supplementary Table S1) using the Mini Carbon Dating System at the Alfred Wegener Institute (AWI), Bremerhaven, Germany. The  $^{14}\text{C}$  ages were calibrated to calendar ages using the PaleoDataView software (v0.9.5.25; Heaton et al., 2020; Langner and Mulitza, 2019).

Additionally, to further refine the age model, we considered age control tie points identified in records from a nearby marine core U1537 (MS, XRF-Fe and Opal) and the EDML ice core (ssNa+). See Supplementary Fig. S2 for the tie points identified in the respective records of marine core PS118\_63-1 with marine core U1537 and EDML ice core. The tuning of these cores with marine core PS118\_63-1 was conducted using the QAnalyseries software (v1.5.1; Kotov and Pälke, 2018). A summary of the tie points used for the establishment of the age model of marine core PS118\_63-1 is provided in Supplementary Table S2. To account for age uncertainty, we imposed an age error of  $\pm 1$  kyr for all the tuning tie points, with the exception of four tie points from U1537-MS. We adopted the age errors from the age model of U1537 for these four tie points instead (refer also to Supplementary Table 2 of Weber et al., 2022). Lastly, the Bayesian age-depth modeling was established using Bacon v2.5.8 (Blaauw and Christen, 2011) on RStudio v2022.07.02.

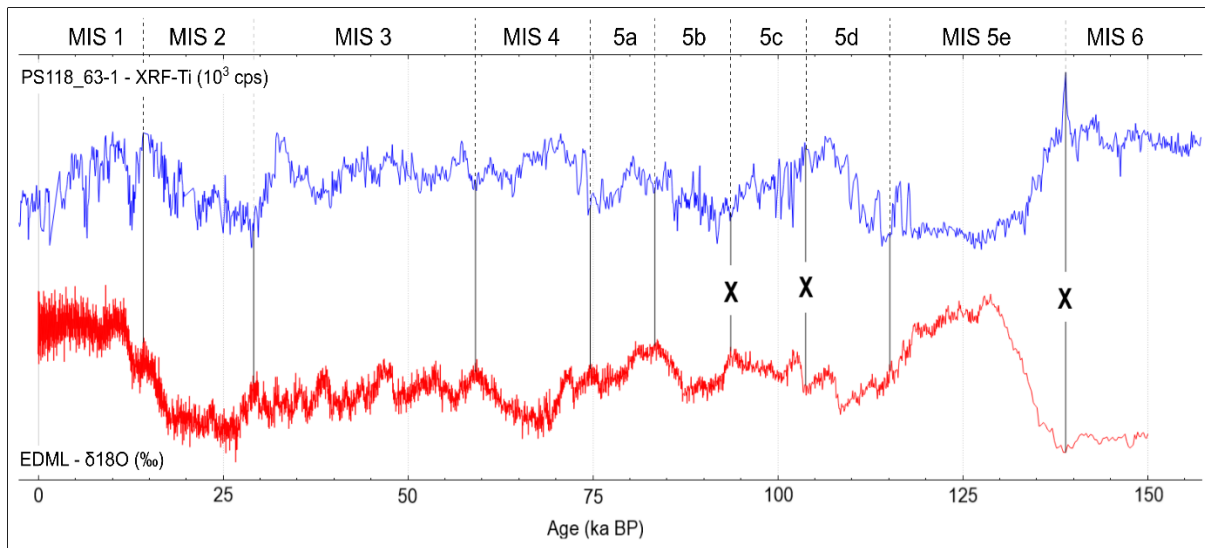

**Supplementary Figure S1.** Age-depth profile of marine sediment core PS118\_63-1 against that of the EDML  $\delta^{18}\text{O}$  record. Black crosses indicate tie points that were not chosen for use in the age model after careful comparison between each age control tie points. Age intervals for MIS 1 - 4 and 6 are in accordance to Lisiecki and Raymo (2005) and MIS 5 substages are referenced to Bianchi and Gersonde (2002).

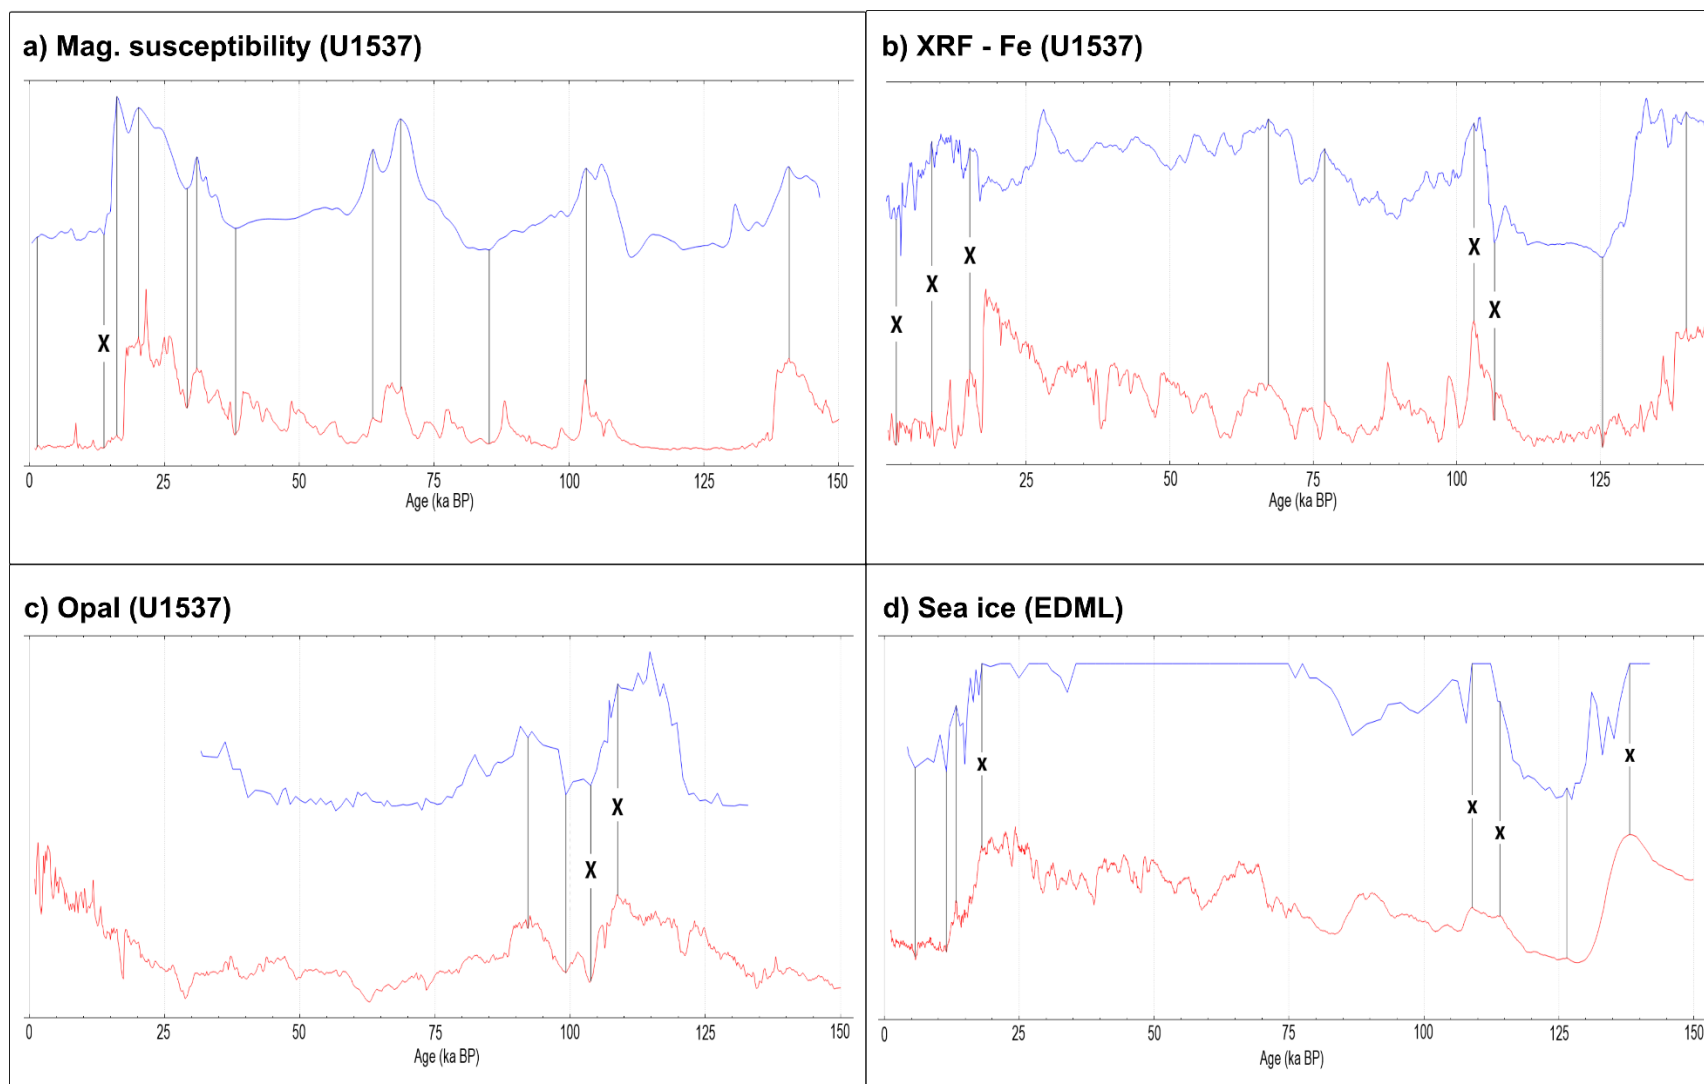

33  
34  
35  
36

**Supplementary Figure S2.** Plots of age control tie points identified in records a) magnetic susceptibility, b) XRF – Fe and c) opal records of marine core U1537 (red) against marine core PS118\_63-1 (blue), and d) EDML ssNa<sup>+</sup> record (red) against that of the PIPSO<sub>25</sub> record from marine core PS118\_63-1 (blue). Black crosses indicate tie points that were not selected for inclusion in the age model after careful comparison between the respective records.

37 **Supplementary Table S1.** Radiocarbon dates taken from marine sediment core PS118\_63-1.

| Sample Name          | AWI Nr.  | Material             | F <sup>14</sup> C | ± (abs) | <sup>14</sup> C age (kyrs) | ± <sup>14</sup> C age (kyrs) | Cal age (ka BP) | ± cal age (kyrs) |
|----------------------|----------|----------------------|-------------------|---------|----------------------------|------------------------------|-----------------|------------------|
| PS118_63-1_163-165cm | 9742.1.1 | <i>N. pachyderma</i> | 0.1259            | 0.0025  | 16.647                     | 0.158                        | 17.603          | 0.935            |
| PS118_63-1_179-181cm | 9743.1.1 | <i>N. pachyderma</i> | 0.0845            | 0.0023  | 19.850                     | 0.221                        | 21.422          | 0.862            |

38

39 **Supplementary Table S2:** Tie points used for age-depth model for marine sediment core PS118\_63-1.

| S/N | MIS | Depth (m) | Age (ka BP) | ± Age (kyrs)       | Tie point              |
|-----|-----|-----------|-------------|--------------------|------------------------|
| 1   | 1   | 0.076     | 1.2         | 1                  | U1537-MS               |
| 2   | 1   | 0.125     | 5.772       | 1                  | EDML-ssNa+             |
| 3   | 1   | 0.625     | 10.675      | 1                  | EDML-ssNa+             |
| 4   | 1   | 0.925     | 13.352      | 1                  | EDML-ssNa+             |
| 5   | 1   | 1         | 14          | 1                  | EDML-δ <sup>18</sup> O |
| 6   | 2   | 1.516     | 16.2        | 1                  | U1537-MS               |
| 7   | 2   | 1.64      | 17.603      | 0.935 <sup>^</sup> | <sup>14</sup> C-dating |
| 8   | 2   | 1.706     | 20          | 1                  | U1537-MS               |
| 9   | 2   | 1.8       | 21.422      | 0.862 <sup>^</sup> | <sup>14</sup> C-dating |
| 10  | 3   | 2         | 29          | 1                  | EDML-δ <sup>18</sup> O |
| 11  | 3   | 2.018     | 29.21       | 0.78 <sup>*</sup>  | U1537-MS               |
| 12  | 3   | 2.098     | 31.2        | 1                  | U1537-MS               |
| 13  | 3   | 2.548     | 38          | 1                  | U1537-MS               |
| 14  | 4   | 3.1       | 57          | 1                  | EDML-δ <sup>18</sup> O |
| 15  | 4   | 3.228     | 63.64       | 2.28 <sup>*</sup>  | U1537-MS               |
| 16  | 4   | 3.46      | 67.2        | 1                  | U1537-Fe               |
| 17  | 4   | 3.478     | 68.8        | 2.1 <sup>*</sup>   | U1537-MS               |
| 18  | 5a  | 3.6       | 74          | 1                  | EDML-δ <sup>18</sup> O |
| 19  | 5a  | 3.84      | 76.8        | 1                  | U1537-Fe               |
| 20  | 5b  | 3.9       | 83          | 1                  | EDML-δ <sup>18</sup> O |
| 21  | 5b  | 4.028     | 85          | 1                  | U1537-MS               |
| 22  | 5b  | 4.33      | 92          | 1                  | U1537-Opal             |
| 23  | 5c  | 4.83      | 99.2        | 1                  | U1537-Opal             |
| 24  | 5d  | 4.868     | 103.17      | 1.71 <sup>*</sup>  | U1537-MS               |
| 25  | 5e  | 5.25      | 114         | 1                  | EDML-δ <sup>18</sup> O |
| 26  | 5e  | 5.68      | 125.2       | 1                  | U1537-Fe               |
| 27  | 5e  | 5.83      | 126.336     | 1                  | EDML-ssNa+             |
| 28  | 6   | 6.2       | 130         | 1                  | <i>R. leventaræ</i>    |
| 29  | 6   | 6.56      | 139.8       | 1                  | U1537-Fe               |
| 30  | 6   | 6.588     | 140.6       | 1                  | U1537-MS               |

<sup>^</sup>Age error taken from calibrated age uncertainty (refer to Supplementary Table S1)

<sup>\*</sup>Age error adopted from age model for marine core U1537 (refer to Supplementary Table 2 of Weber et al., 2022)

40

41

42

43 **S2:  $^{230}\text{Th}$ -excess constant-rate-of-supply model**

44 To estimate the  $^{230}\text{Th}$ -excess constant-rate-of-supply (CRS) age model for PS118\_63-1, a total of  
45 54 freeze-dried, grounded and homogenized sediment samples were selected (at specific depth  
46 intervals) for the determination of uranium (U) and thorium (Th) isotopes ( $^{230}\text{Th}$ ,  $^{232}\text{Th}$ ,  $^{238}\text{U}$  and  $^{234}\text{U}$ ).  
47 The samples were first digested in a pressure-assisted microwave digestion system (CEM MarsXpress;  
48 24 samples per batch). Following which, 15 mL of the digested solution underwent a separation and  
49 purification process via the seaFAST automatic column separation system, using TRU resin. Each Th/U  
50 fraction was then analyzed via sector-field inductively coupled plasma mass spectrometry (SF-ICP-MS  
51 Element2). U-isotopes were measured in low resolution using a cyclonic spray chamber while Th-  
52 isotopes were measured with an Apex IR desolvation device for increasing ion yield, and in a custom-  
53 made resolution of R=2000 for increasing abundance sensitivity. The methods employed in the  
54 determination of  $^{230}\text{Th}$ -excess and subsequent CRS-dating for PS118\_63-1 are described in Geibert et  
55 al. (2019), with the calculation of the CRS age following a method by Appleby and Oldfield (1978).

56 The robustness of the age model for PS118\_63-1 determined using 30 tie points (Supplementary  
57 Table S2) is supported by the strong correlation between the tie points-derived age model and  
58 estimations via the  $^{230}\text{Th}$ -excess CRS-dating approach (Supplementary Fig. S3). The deviations are to  
59 be expected considering possible changes in focusing and the limited  $^{230}\text{Th}$ -inventory considered in this  
60 core.

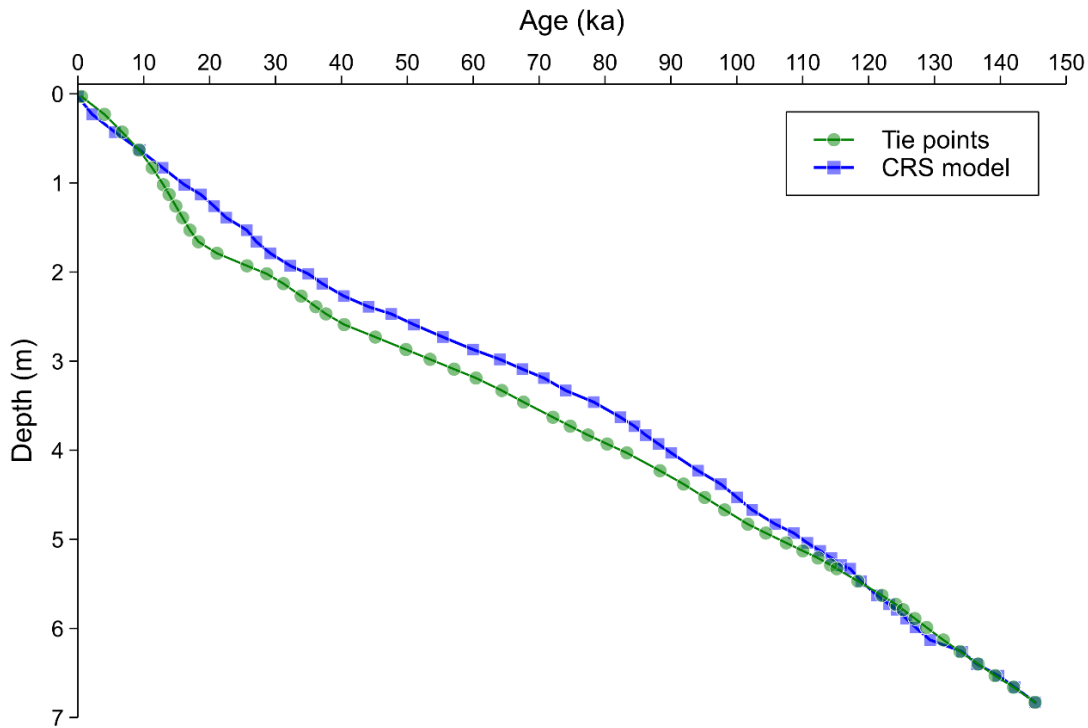

61  
62 **Supplementary Figure S3.** Comparison of age-depth profile of PS118\_63-1 established based on tie points and  
63  $^{230}\text{Th}$ -excess CRS model.

64

## 65 **S3: Numerical model and climate simulations**

### 66 **3.1 Community Earth System Models**

67 The Community Earth System Models (COSMOS) have been successfully applied for the study of  
68 both colder and warmer than present climates – during, and beyond, the Cenozoic, both at orbital and  
69 tectonic time scales. In many cases, the COSMOS have helped to improve our understanding of  
70 inferences from the geologic record. They have provided a dynamical framework of relevant processes  
71 in the climate system that may mechanistically explain reconstructed climate patterns. Examples for  
72 this work include simulations of the climates of the Cretaceous (Klages et al., 2020), of the Miocene  
73 (Knorr and Lohmann, 2014; Stein et al., 2016), of the Pliocene (Stepanek et al., 2020), of the  
74 Penultimate Glacial (Stein et al., 2017), of the LIG (Gierz et al., 2017; Pfeiffer and Lohmann, 2016; Stein  
75 et al., 2017), of the LGM (Zhang et al., 2013), and of the Holocene (Guagnin et al., 2016). Furthermore,  
76 the model has been employed towards a large number of process studies. Among these are the works  
77 by Knorr et al. (2021) on glacial termination, the study by Kaboth-Bahr et al. (2021) on the delay of  
78 Northern Hemisphere glaciation by Mediterranean heat injection into the North Atlantic Ocean, the  
79 publication by Zhang et al. (2021) on the impact of astronomical forcing on Pleistocene millennial  
80 climate variability, and the investigation by Lohmann et al. (2022) on the potential contribution of  
81 increased vertical mixing towards reduced meridional temperature gradients in warm climates of the  
82 Pliocene and Miocene.  
83

### 84 **3.2 Modelled climate states**

85 The climate states *piControl*, *mh6k*, *lgm21k*, *lig125k*, and *pgm140k* are derived from equilibrium  
86 climate simulations, where we analyze the climate state at the end of a spin up. In these cases, the  
87 COSMOS have been instantaneously exposed to reconstructions of greenhouse gases and of orbital  
88 forcing, and to paleogeography, if applicable. An exception to this methodology is the LIG climate state  
89 at 128 ka BP, derived from simulation *lig128k*. This simulation stems from the computation of a transient  
90 evolution of LIG climate from 130 ka BP to 115 ka BP, where the COSMOS have been employed with  
91 time-varying greenhouse gas concentrations and orbital forcing applying an acceleration of a factor of  
92 10. The initial ocean state at 130 ka BP has been created to mirror conditions that are representative  
93 for the penultimate deglaciation, Termination II (TII; 140 – 130 ka BP). This ocean state has been  
94 created based on a weak hosing (0.05 Sv) under perpetual 130 ka BP forcing. To derive the climate  
95 conditions at 128 ka BP, we average the transient model climate state over the 100 model years that  
96 refer to the period from 128.5 ka BP to 127.5 ka BP. Details of the model setups of the various  
97 simulations are provided in Supplementary Table S3.

98

99

100 **Supplementary Table S1.** Boundary conditions and model forcings for climate simulations. We present: forcing values of eccentricity of the Earth's orbit (ecc), obliquity of the  
 101 Earth's rotation axis (obld), longitude of the perihelion of the Earth's orbit (lonp); atmospheric concentrations of greenhouse gas species carbon dioxide (CO<sub>2</sub>), methane, (CH<sub>4</sub>),  
 102 nitrous oxide (N<sub>2</sub>O); where applicable, references (ref) to employed paleogeography, orbital forcing, atmospheric greenhouse gas forcing, and to a study that previously  
 103 described the simulation are provided.

| Simulation | Orbital forcing |          |          |                                                      | Greenhouse gas forcing |                       |                        |                                                                 | Paleography    |                                                      | Previously published by |             |
|------------|-----------------|----------|----------|------------------------------------------------------|------------------------|-----------------------|------------------------|-----------------------------------------------------------------|----------------|------------------------------------------------------|-------------------------|-------------|
|            | ecc             | obld (°) | Lonp (°) | ref                                                  | CO <sub>2</sub> (ppm)  | CH <sub>4</sub> (ppb) | N <sub>2</sub> O (ppb) | ref                                                             | reconstruction | ref                                                  | ref                     | name in ref |
| piControl  | 0.016724        | 23.4468  | 282.157  | Berger (1978)                                        | 280                    | 760                   | 270                    | Crucifix et al. (2005)                                          | —              | —                                                    | Wei and Lohmann (2012)  | CTL         |
| mh6k       | 0.018682        | 24.1048  | 180.918  | Berger (1978)                                        | 280                    | 650                   | 270                    | Crucifix et al. (2005) (as PMIP3 6ka)                           | —              | —                                                    | Wei and Lohmann (2012)  | H6K         |
| lgm21k     | 0.018994        | 22.949   | 114.42   | Braconnot and Kageyama (2015) and references therein | 185                    | 350                   | 200                    | PMIP3 21ka Braconnot and Kageyama (2015) and references therein | PMIP3 21ka     | Braconnot and Kageyama (2015) and references therein | Zhang et al. (2013)     | LGMW        |
| lig125k    | 0.040013        | 23.798   | 127.14   | PMIP3 125ka Lunt et al. (2013)                       | 275.938                | 640.417               | 263.084                | PMIP3 125ka Lunt et al. (2013)                                  | as piControl   | —                                                    | this study              | —           |
| lig128k    | 0.039017        | 24.131   | 79.65    | PMIP3 128ka Lunt et al. (2013)                       | 275                    | 709                   | 512                    | 128ka Lunt et al. (2013)                                        | as piControl   | —                                                    | this study              | —           |
| pgm140k    | 0.032796        | 23.4138  | 253.244  | Berger et al. (1978)                                 | 185                    | 350                   | 200                    | as lgm21k                                                       | as lgm21k      | as lgm21k                                            | this study              | —           |

104  
105

106 **S4: Productivity signals**

107 The concentration of total isoprenoid glycerol dialkyl glycerol tetraether lipids (isoGDGTs) and  
 108 hydroxylated (OH)-isoGDGTs, synthesized from marine archaea (Schouten et al., 2013), varies  
 109 between 1.36 – 358.32 µg/g OC and 0.01 – 105.71 µg/g OC, respectively. The concentration of total  
 110 branched GDGTs (brGDGTs), mainly derived from terrestrial bacteria or eukaryotes in soils and peats  
 111 (Hopmans et al., 2004), ranges between 0.11 and 7.34 µg/g OC. Lastly, the concentration of  
 112 phytosterols fluctuates between 0 – 54.28 µg/g OC (Brassicasterol) and 0 – 8.51 µg/g OC (Dinosterol).  
 113 The brassicasterol and opal (bSiO<sub>2</sub>) profiles, often used as diatom productivity indicators, exhibit  
 114 contrasting trends, especially between 140 – 110 ka BP. This discrepancy likely arises from the limited  
 115 presence of brassicasterol-producing diatoms in the area, further affected by preferential growth  
 116 conditions and preservation effects. As a result, the brassicasterol-producing diatoms signal is  
 117 consistently attenuated within the overall opal signal (Badejo et al., 2017; Cavagna et al., 2013).

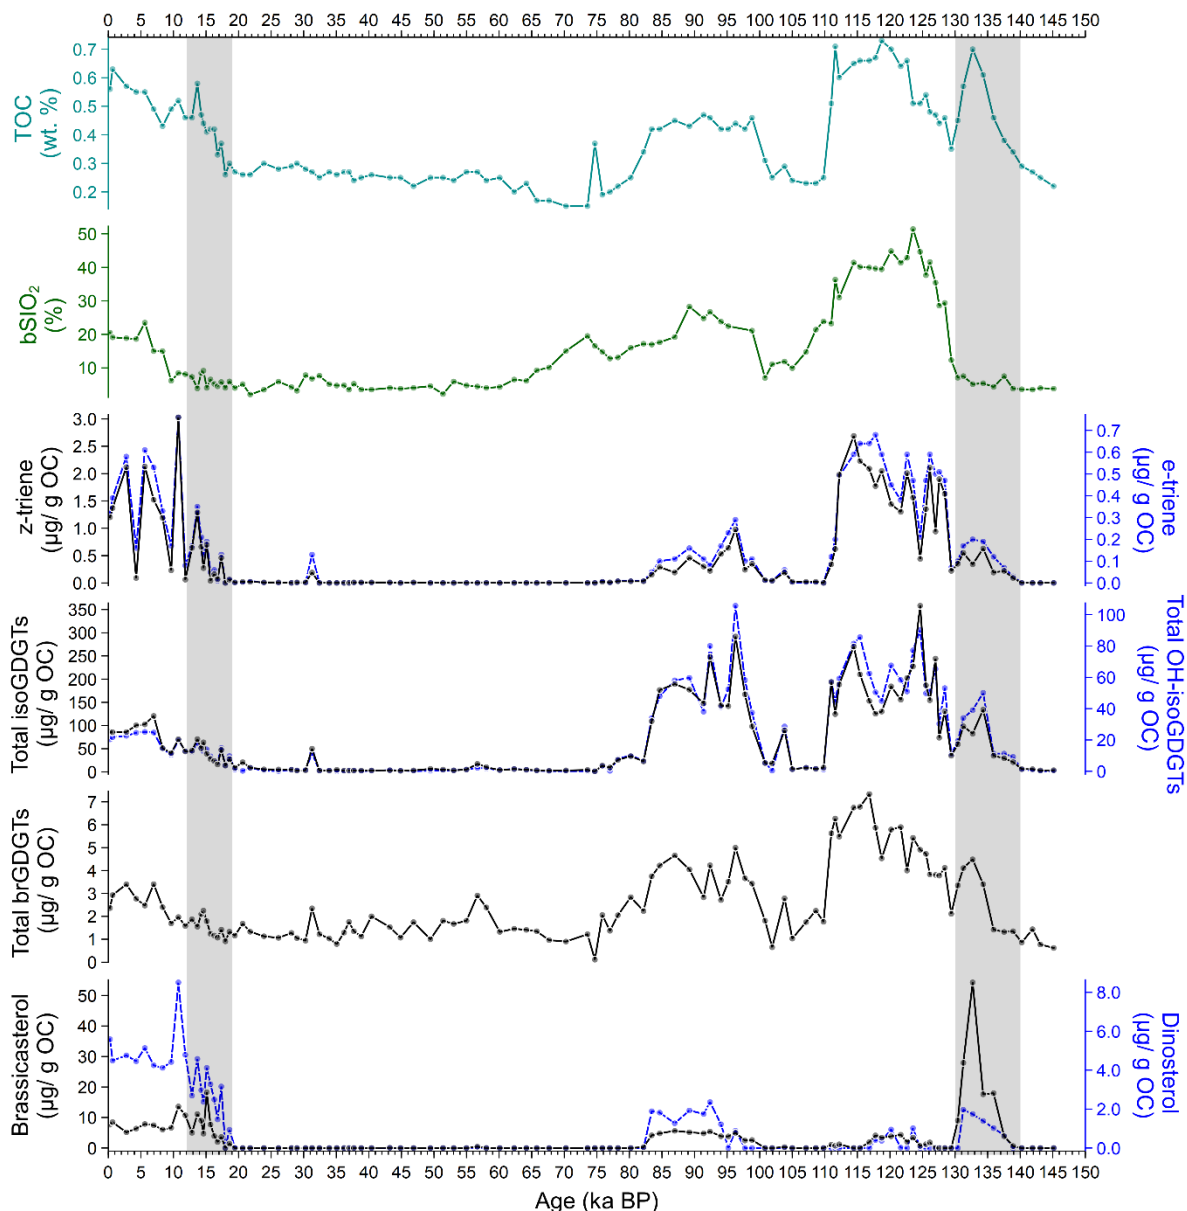

118  
 119 **Supplementary Figure S4.** Plots of organic matter signals from core PS118\_63-1. From top to bottom: TOC,  
 120 biogenic opal, HBI-based phytoplankton, total isoprenoid-GDGTs, total branched-GDGTs and phytosterols.  
 121 Shaded intervals indicate Termination I and Termination II, respectively.

123 **S5: TEX<sub>86</sub><sup>L</sup>-derived subsurface ocean temperature and GDGT-related indices**

124 The TEX<sub>86</sub><sup>L</sup>-derived subsurface ocean temperature (OT) shows a temperature range between -  
125 2.58 and 0.98°C at the core site. However, a review of the GDGT-related indices provides strong  
126 evidence of factors that result in biasness in our TEX<sub>86</sub><sup>L</sup>-based temperature reconstruction, especially  
127 during MIS 2 – 4, 5d and 6 (Supplementary Fig. S5). For example, a GDGT-[2]/[3] ratio greater than  
128 five indicates contribution from deep-dwelling archaea (>1000 water depth), which are regulated by  
129 processes different than that of their surface water counterparts (Kim et al., 2015; Taylor et al., 2013).  
130 A higher abundance of isoGDGT-0 relative to crenarchaeol (%GDGT-0 value > 67%) also suggests a  
131 methanogenic source for the isoGDGT-0 (Inglis et al., 2015). Lastly, values of ΔRI and BIT indices that  
132 are higher than 0.3, imply inputs from potential nonthermal influences and/or terrestrial origin,  
133 respectively (Fietz et al., 2016; Park, 2019; Weijers et al., 2006; Zhang et al., 2016).

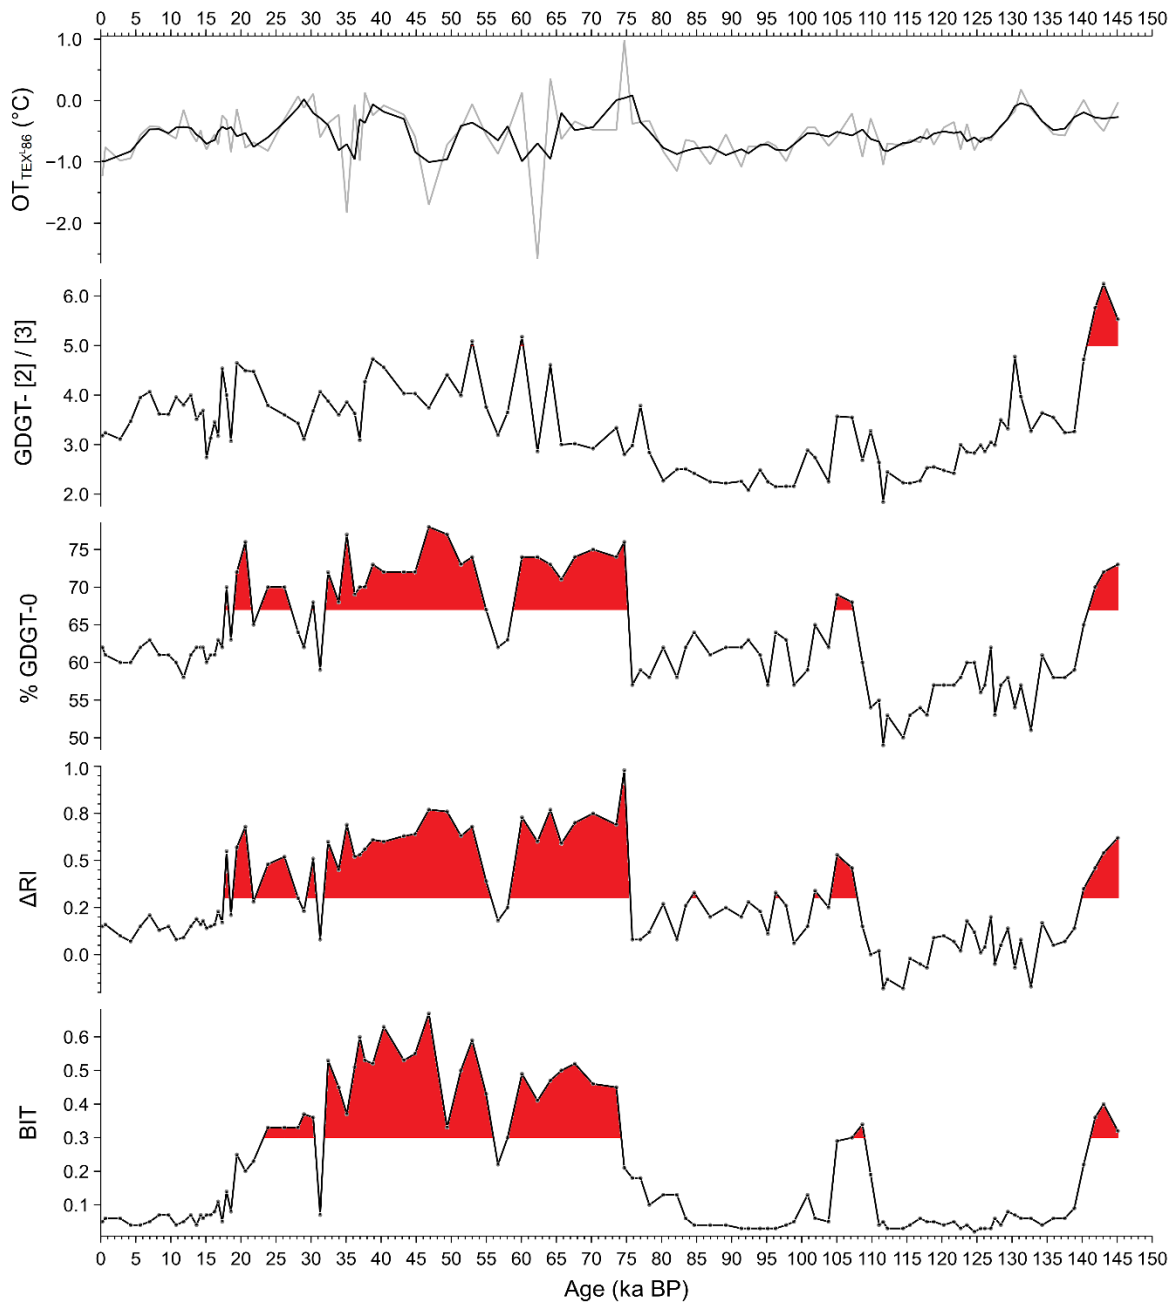

134

135 **Supplementary Figure S5.** Records of TEX<sub>86</sub><sup>L</sup> ocean temperature and respective GDGT-related indices: GDGT  
136 [2]/[3], %GDGT-0, delta ring index and BIT for core PS118\_63-1. Intervals with strong non-thermal influences are  
137 highlighted in red on the various index curves: GDGT [2]/[3] > 5.0, %GDGT-0 > 67%, ΔRI and BIT > 0.3.



138 **References**

- 139 Appleby, P. G. and Oldfield, F.: The calculation of lead-210 dates assuming a constant rate of supply  
140 of unsupported <sup>210</sup>Pb to the sediment, *Catena*, 5, 1-8, 1978.
- 141 Badejo, A. O., Seo, I., Kim, W., Hyeong, K., and Ju, S.-J.: Effect of eolian Fe-supply change on the  
142 phytoplankton productivity and community in central equatorial Pacific Ocean during the Pleistocene:  
143 A lipid biomarker approach, *Organic Geochemistry*, 112, 170-176,  
144 <https://doi.org/10.1016/j.orggeochem.2017.07.010>, 2017.
- 145 Berger, A.: Long-Term Variations of Daily Insolation and Quaternary Climatic Changes, *Journal of*  
146 *Atmospheric Sciences*, 35, 2362-2367, [https://doi.org/10.1175/1520-0469\(1978\)035<2362:LTVODI>2.0.CO;2](https://doi.org/10.1175/1520-0469(1978)035<2362:LTVODI>2.0.CO;2), 1978.
- 148 Bianchi, C. and Gersonde, R.: The Southern Ocean surface between Marine Isotope Stages 6 and 5d:  
149 Shape and timing of climate changes, *Palaeogeography, Palaeoclimatology, Palaeoecology*, 187, 151-  
150 177, [https://doi.org/10.1016/S0031-0182\(02\)00516-3](https://doi.org/10.1016/S0031-0182(02)00516-3), 2002.
- 151 Blaauw, M. and Christen, J. A.: Flexible paleoclimate age-depth models using an autoregressive  
152 gamma process, *Bayesian Analysis*, 6, 457-474, 418, 2011.
- 153 Braconnot, P. and Kageyama, M.: Shortwave forcing and feedbacks in Last Glacial Maximum and Mid-  
154 Holocene PMIP3 simulations, *Philosophical Transactions of the Royal Society A: Mathematical,*  
155 *Physical and Engineering Sciences*, 373, 20140424, doi:10.1098/rsta.2014.0424, 2015.
- 156 Cavagna, A. J., Dehairs, F., Bouillon, S., Woule-Ebongué, V., Planchon, F., Delille, B., and Bouloubassi,  
157 I.: Water column distribution and carbon isotopic signal of cholesterol, brassicasterol and particulate  
158 organic carbon in the Atlantic sector of the Southern Ocean, *Biogeosciences*, 10, 2787-2801,  
159 10.5194/bg-10-2787-2013, 2013.
- 160 Crucifix, M., Braconnot, P., Harrison, S. P., and Otto-Bliesner, B.: Second phase of paleoclimate  
161 modelling intercomparison project, *Eos, Transactions American Geophysical Union*, 86, 264-264,  
162 <https://doi.org/10.1029/2005EO280003>, 2005.
- 163 Fietz, S., Ho, S. L., Huguet, C., Rosell-Melé, A., and Martínez-García, A.: Appraising GDGT-based  
164 seawater temperature indices in the Southern Ocean, *Organic Geochemistry*, 102, 93-105,  
165 <https://doi.org/10.1016/j.orggeochem.2016.10.003>, 2016.
- 166 Geibert, W., Stimac, I., Rutgers Van Der Loeff, M., and Kuhn, G.: Dating Deep-Sea Sediments With  
167 <sup>230</sup>Th Excess Using a Constant Rate of Supply Model, *Paleoceanography and Paleoclimatology*, 34,  
168 1895-1912, <https://doi.org/10.1029/2019PA003663>, 2019.
- 169 Gierz, P., Werner, M., and Lohmann, G.: Simulating climate and stable water isotopes during the Last  
170 Interglacial using a coupled climate-isotope model, *Journal of Advances in Modeling Earth Systems*, 9,  
171 2027-2045, <https://doi.org/10.1002/2017MS001056>, 2017.
- 172 Guagnin, M., Jennings, R., Eager, H., Parton, A., Stimpson, C., Stepanek, C., Pfeiffer, M., Groucutt, H.  
173 S., Drake, N. A., Alsharekh, A., and Petraglia, M. D.: Rock art imagery as a proxy for Holocene  
174 environmental change: A view from Shuwaymis, NW Saudi Arabia, *The Holocene*, 26, 1822-1834,  
175 10.1177/0959683616645949, 2016.
- 176 Heaton, T. J., Köhler, P., Butzin, M., Bard, E., Reimer, R. W., Austin, W. E., Ramsey, C. B., Grootes,  
177 P. M., Hughen, K. A., and Kromer, B.: Marine20—the marine radiocarbon age calibration curve (0–  
178 55,000 cal BP), *Radiocarbon*, 62, 779-820, 2020.
- 179 Hopmans, E. C., Weijers, J. W. H., Schefuß, E., Herfort, L., Sinninghe Damsté, J. S., and Schouten, S.:  
180 A novel proxy for terrestrial organic matter in sediments based on branched and isoprenoid tetraether  
181 lipids, *Earth and Planetary Science Letters*, 224, 107-116, <https://doi.org/10.1016/j.epsl.2004.05.012>,  
182 2004.

183 Inglis, G. N., Farnsworth, A., Lunt, D., Foster, G. L., Hollis, C. J., Pagani, M., Jardine, P. E., Pearson,  
184 P. N., Markwick, P., Galsworthy, A. M. J., Raynham, L., Taylor, K. W. R., and Pancost, R. D.: Descent  
185 toward the Icehouse: Eocene sea surface cooling inferred from GDGT distributions, *Paleoceanography*,  
186 30, 1000-1020, <https://doi.org/10.1002/2014PA002723>, 2015.

187 Kaboth-Bahr, S., Bahr, A., Stepanek, C., Catunda, M. C. A., Karas, C., Ziegler, M., García-Gallardo, Á.,  
188 and Grunert, P.: Mediterranean heat injection to the North Atlantic delayed the intensification of  
189 Northern Hemisphere glaciations, *Communications Earth & Environment*, 2, 158, 10.1038/s43247-021-  
190 00232-5, 2021.

191 Kim, J.-H., Schouten, S., Rodrigo-Gámiz, M., Rampen, S., Marino, G., Huguet, C., Helmke, P., Buscail,  
192 R., Hopmans, E. C., Pross, J., Sangiorgi, F., Middelburg, J. B. M., and Sinninghe Damsté, J. S.:  
193 Influence of deep-water derived isoprenoid tetraether lipids on the TEX86H paleothermometer in the  
194 Mediterranean Sea, *Geochimica et Cosmochimica Acta*, 150, 125-141,  
195 <https://doi.org/10.1016/j.gca.2014.11.017>, 2015.

196 Klages, J. P., Salzmann, U., Bickert, T., Hillenbrand, C.-D., Gohl, K., Kuhn, G., Bohaty, S. M., Titschack,  
197 J., Müller, J., Frederichs, T., Bauersachs, T., Ehrmann, W., van de Flierdt, T., Pereira, P. S., Larter, R.  
198 D., Lohmann, G., Niezgodzki, I., Uenzelmann-Neben, G., Zundel, M., Spiegel, C., Mark, C., Chew, D.,  
199 Francis, J. E., Nehrke, G., Schwarz, F., Smith, J. A., Freudenthal, T., Esper, O., Pälike, H., Ronge, T.  
200 A., Dziadek, R., Afanasyeva, V., Arndt, J. E., Ebermann, B., Gebhardt, C., Hochmuth, K., Küssner, K.,  
201 Najman, Y., Riefstahl, F., Scheinert, M., and the Science Team of Expedition, P. S.: Temperate  
202 rainforests near the South Pole during peak Cretaceous warmth, *Nature*, 580, 81-86, 10.1038/s41586-  
203 020-2148-5, 2020.

204 Knorr, G. and Lohmann, G.: Climate warming during Antarctic ice sheet expansion at the Middle  
205 Miocene transition, *Nature Geoscience*, 7, 376-381, 10.1038/ngeo2119, 2014.

206 Knorr, G., Barker, S., Zhang, X., Lohmann, G., Gong, X., Gierz, P., Stepanek, C., and Stap, L. B.: A  
207 salty deep ocean as a prerequisite for glacial termination, *Nature Geoscience*, 14, 930-936,  
208 10.1038/s41561-021-00857-3, 2021.

209 Kotov, S. and Pälike, H.: QAnalySeries-a cross-platform time series tuning and analysis tool, AGU Fall  
210 Meeting Abstracts, PP53D-1230,

211 Langner, M. and Multiza, S.: Technical note: PaleoDataView – a software toolbox for the collection,  
212 homogenization and visualization of marine proxy data, *Clim. Past*, 15, 2067-2072, 10.5194/cp-15-  
213 2067-2019, 2019.

214 Lisiecki, L. E. and Raymo, M. E.: A Pliocene-Pleistocene stack of 57 globally distributed benthic  $\delta^{18}O$   
215 records, *Paleoceanography*, 20, <https://doi.org/10.1029/2004PA001071>, 2005.

216 Lohmann, G., Knorr, G., Hossain, A., and Stepanek, C.: Effects of CO<sub>2</sub> and Ocean Mixing on Miocene  
217 and Pliocene Temperature Gradients, *Paleoceanography and Paleoclimatology*, 37, e2020PA003953,  
218 <https://doi.org/10.1029/2020PA003953>, 2022.

219 Lunt, D. J., Abe-Ouchi, A., Bakker, P., Berger, A., Braconnot, P., Charbit, S., Fischer, N., Herold, N.,  
220 Jungclauss, J. H., Khon, V. C., Krebs-Kanzow, U., Langebroek, P. M., Lohmann, G., Nisancioglu, K. H.,  
221 Otto-Bliesner, B. L., Park, W., Pfeiffer, M., Phipps, S. J., Prange, M., Rachmayani, R., Renssen, H.,  
222 Rosenbloom, N., Schneider, B., Stone, E. J., Takahashi, K., Wei, W., Yin, Q., and Zhang, Z. S.: A multi-  
223 model assessment of last interglacial temperatures, *Clim. Past*, 9, 699-717, 10.5194/cp-9-699-2013,  
224 2013.

225 Park, E.: Variations in GDGT flux and TEX86 thermometry in three distinct oceanic regimes of the  
226 Atlantic Ocean: a sediment trap study, University of Bremen, 2019.

227 Pfeiffer, M. and Lohmann, G.: Greenland Ice Sheet influence on Last Interglacial climate: global  
228 sensitivity studies performed with an atmosphere–ocean general circulation model, *Clim. Past*, 12,  
229 1313-1338, 10.5194/cp-12-1313-2016, 2016.

230 Schouten, S., Hopmans, E. C., and Damsté, J. S. S.: The organic geochemistry of glycerol dialkyl  
231 glycerol tetraether lipids: A review, *Organic geochemistry*, 54, 19-61,  
232 <http://dx.doi.org/10.1016/j.orggeochem.2012.09.006>, 2013.

233 Stein, R., Fahl, K., Gierz, P., Niessen, F., and Lohmann, G.: Arctic Ocean sea ice cover during the  
234 penultimate glacial and the last interglacial, *Nature Communications*, 8, 373, 10.1038/s41467-017-  
235 00552-1, 2017.

236 Stein, R., Fahl, K., Schreck, M., Knorr, G., Niessen, F., Forwick, M., Gebhardt, C., Jensen, L., Kaminski,  
237 M., Kopf, A., Matthiessen, J., Jokat, W., and Lohmann, G.: Evidence for ice-free summers in the late  
238 Miocene central Arctic Ocean, *Nature Communications*, 7, 11148, 10.1038/ncomms11148, 2016.

239 Stepanek, C., Samakinwa, E., Knorr, G., and Lohmann, G.: Contribution of the coupled atmosphere–  
240 ocean–sea ice–vegetation model COSMOS to the PliomIP2, *Clim. Past*, 16, 2275-2323, 10.5194/cp-  
241 16-2275-2020, 2020.

242 Taylor, K. W. R., Huber, M., Hollis, C. J., Hernandez-Sanchez, M. T., and Pancost, R. D.: Re-evaluating  
243 modern and Palaeogene GDGT distributions: Implications for SST reconstructions, *Global and  
244 Planetary Change*, 108, 158-174, <https://doi.org/10.1016/j.gloplacha.2013.06.011>, 2013.

245 Weber, M. E., Bailey, I., Hemming, S. R., Martos, Y. M., Reilly, B. T., Ronge, T. A., Brachfeld, S.,  
246 Williams, T., Raymo, M., Belt, S. T., Smik, L., Vogel, H., Peck, V. L., Armbrrecht, L., Cage, A., Cardillo,  
247 F. G., Du, Z., Fauth, G., Fogwill, C. J., Garcia, M., Garnsworthy, M., Glüder, A., Guitard, M., Gutjahr,  
248 M., Hernández-Almeida, I., Hoem, F. S., Hwang, J.-H., Iizuka, M., Kato, Y., Kenlee, B., Oconnell, S.,  
249 Pérez, L. F., Seki, O., Stevens, L., Tauxe, L., Tripathi, S., Warnock, J., and Zheng, X.: Antiphased dust  
250 deposition and productivity in the Antarctic Zone over 1.5 million years, *Nature Communications*, 13,  
251 2044, 10.1038/s41467-022-29642-5, 2022.

252 Wei, W. and Lohmann, G.: Simulated Atlantic Multidecadal Oscillation during the Holocene, *Journal of  
253 Climate*, 25, 6989-7002, <https://doi.org/10.1175/JCLI-D-11-00667.1>, 2012.

254 Weijers, J. W. H., Schouten, S., Spaargaren, O. C., and Sinninghe Damsté, J. S.: Occurrence and  
255 distribution of tetraether membrane lipids in soils: Implications for the use of the TEX86 proxy and the  
256 BIT index, *Organic Geochemistry*, 37, 1680-1693, <https://doi.org/10.1016/j.orggeochem.2006.07.018>,  
257 2006.

258 Zhang, X., Lohmann, G., Knorr, G., and Xu, X.: Different ocean states and transient characteristics in  
259 Last Glacial Maximum simulations and implications for deglaciation, *Clim. Past*, 9, 2319-2333,  
260 10.5194/cp-9-2319-2013, 2013.

261 Zhang, X., Barker, S., Knorr, G., Lohmann, G., Drysdale, R., Sun, Y., Hodell, D., and Chen, F.: Direct  
262 astronomical influence on abrupt climate variability, *Nature Geoscience*, 14, 819-826, 10.1038/s41561-  
263 021-00846-6, 2021.

264 Zhang, Y. G., Pagani, M., and Wang, Z.: Ring Index: A new strategy to evaluate the integrity of TEX86  
265 paleothermometry, *Paleoceanography*, 31, 220-232, <https://doi.org/10.1002/2015PA002848>, 2016.

266 Zielinski, U., Bianchi, C., Gersonde, R., and Kunz-Pirrung, M.: Last occurrence datums of the diatoms  
267 *Rouxia leventerae* and *Rouxia constricta*: indicators for marine isotope stages 6 and 8 in Southern  
268 Ocean sediments, *Marine Micropaleontology*, 46, 127-137, [https://doi.org/10.1016/S0377-  
269 8398\(02\)00042-7](https://doi.org/10.1016/S0377-8398(02)00042-7), 2002.  
270  
271
